# Supplementary material
Source: publisher figshare collection journal article supplement (https://acs.figshare.com/ndownloader/files/14507582)

Novel aryloxyethyl derivatives of  
1-(1-benzoylpiperidin-4-yl)methanamine as the  
Extracellular Regulated Kinases 1/2 (ERK1/2)  
phosphorylation-preferring serotonin 5-HT<sub>1A</sub>  
receptor biased agonists with robust antidepressant-  
like activity

*Joanna Sniecikowska<sup>a</sup>, Monika Gluch-Lutwin<sup>a</sup>, Adam Bucki<sup>a</sup>, Anna Więckowska<sup>a</sup>, Agata Siwek<sup>a</sup>, Magdalena Jastrzebska-Wiesek<sup>a</sup>, Anna Partyka<sup>a</sup>, Daria Wilczyńska<sup>a</sup>, Karolina Pytka<sup>a</sup>, Krzysztof Pociecha<sup>a</sup>, Agnieszka Cios<sup>a</sup>, Elżbieta Wyska<sup>a</sup>, Anna Wesółowska<sup>a</sup>, Maciej Pawłowski<sup>a</sup>, Mark Varney<sup>b</sup>, Adrian Newman-Tancredi<sup>b</sup>, Marcin Kolaczowski<sup>a\*</sup>*

<sup>a</sup> Faculty of Pharmacy, Jagiellonian University Medical College, 9 Medyczna St., 30 688 Kraków, Poland;

<sup>b</sup> Neurolix Inc. 34145 Pacific Coast Highway #504, Dana Point, CA 92629 USA

\*Corresponding Author Information:

Phone: (48)126205460 Fax: (48)126205458.

E-mail: marcin.kolaczowski@uj.edu.pl

## Contents

## Page number

|                                                                                                                                                                                                |     |
|------------------------------------------------------------------------------------------------------------------------------------------------------------------------------------------------|-----|
| Functional activity results at 5-HT <sub>1A</sub> receptors with the SEM values. ....                                                                                                          | S3  |
| <i>E</i> <sub>max</sub> and EC <sub>50</sub> values (transformed from pEC <sub>50</sub> values) used to calculate Bias Factors for compounds <b>10–17, 19, 20, 22, 27</b> and references ..... | S4  |
| Radioligand binding assay results and methodology for 5-HT <sub>2A</sub> , M <sub>1</sub> and H <sub>1</sub> receptors .....                                                                   | S5  |
| Effect of compound <b>17</b> in the forced swimming test in rats (15 and 60 minutes after oral administration). ....                                                                           | S9  |
| Dose-response curves for functional activity. ....                                                                                                                                             | S10 |

## Functional activity results at 5-HT<sub>1A</sub> receptors with the SEM values.

**Table S1.** Functional activity of compounds **10–17, 19, 20, 22, 27** and references at 5-HT<sub>1A</sub> receptors.

| Compd            | 5-HT <sub>1A</sub> functional activity |                   |                  |                   |                  |                   |                  |                   |
|------------------|----------------------------------------|-------------------|------------------|-------------------|------------------|-------------------|------------------|-------------------|
|                  | ERK                                    |                   | cAMP             |                   | β-arrestin       |                   | Ca <sup>2+</sup> |                   |
|                  | E <sub>MAX</sub>                       | pEC <sub>50</sub> | E <sub>MAX</sub> | pEC <sub>50</sub> | E <sub>MAX</sub> | pEC <sub>50</sub> | E <sub>MAX</sub> | pEC <sub>50</sub> |
| <b>10</b>        | 77% ± 7.9%                             | 7.88 ± 0.07       | 91% ± 5.3%       | 7.10 ± 0.11       | 99% ± 0.5%       | 6.35 ± 0.02       | 74% ± 2.4%       | 7.07 ± 0.02       |
| <b>11</b>        | 95% ± 3.5%                             | 7.90 ± 0.08       | 74% ± 5.1%       | 7.33 ± 0.06       | 101% ± 0.5%      | 6.94 ± 0.11       | 87% ± 7.5%       | 7.84 ± 0.06       |
| <b>12</b>        | 81% ± 6.3%                             | 7.59 ± 0.09       | 79% ± 2.7%       | 6.73 ± 0.01       | 104% ± 2.1%      | 5.70 ± 0.07       | 65% ± 3.0%       | 6.98 ± 0.06       |
| <b>13</b>        | 83% ± 4.6%                             | 7.76 ± 0.14       | 86% ± 4.8%       | 7.26 ± 0.10       | 99% ± 0.8%       | 6.58 ± 0.09       | 52% ± 0.2%       | 7.13 ± 0.01       |
| <b>14</b>        | 85% ± 1.3%                             | 6.77 ± 0.02       | 71% ± 4.7%       | 5.61 ± 0.11       | 70% ± 2.9%       | 5.44 ± 0.03       | NT               | NT                |
| <b>15</b>        | 84% ± 2.3%                             | 7.89 ± 0.09       | 76% ± 7.4%       | 7.18 ± 0.19       | 102% ± 2.4%      | 6.54 ± 0.15       | 73% ± 9.8%       | 6.95 ± 0.01       |
| <b>16</b>        | 92% ± 2.7%                             | 9.10 ± 0.14       | 90% ± 2.3%       | 8.09 ± 0.12       | 96% ± 1.0%       | 7.98 ± 0.02       | 52% ± 2.0%       | 7.39 ± 0.17       |
| <b>17</b>        | 81% ± 7.2%                             | 9.37 ± 0.19       | 89% ± 3.3%       | 8.05 ± 0.09       | 98% ± 1.0%       | 7.68 ± 0.11       | 57% ± 5.8%       | 7.76 ± 0.05       |
| <b>19</b>        | 85% ± 0.6%                             | 9.06 ± 0.17       | 71% ± 7.3%       | 8.04 ± 0.06       | 99% ± 0.9%       | 6.76 ± 0.13       | 58% ± 1.5%       | 7.41 ± 0.09       |
| <b>20</b>        | 99% ± 2.5%                             | 7.62 ± 0.16       | 100% ± 4.0%      | 7.32 ± 0.20       | 101% ± 1.1%      | 6.87 ± 0.09       | 98% ± 1.4%       | 7.34 ± 0.06       |
| <b>22</b>        | 100% ± 5.2%                            | 8.31 ± 0.17       | 90% ± 6.4%       | 7.68 ± 0.08       | 97% ± 2.8%       | 7.60 ± 0.17       | 89% ± 5.3%       | 7.54 ± 0.20       |
| <b>27</b>        | 72% ± 8.2%                             | 7.28 ± 0.02       | 41% ± 1.4%       | 6.03 ± 0.03       | 75% ± 3.7%       | 5.56 ± 0.06       | NT               | NT                |
| <b>1</b>         | 100% ± 4.3%                            | 8.33 ± 0.14       | 92% ± 6.9%       | 7.22 ± 0.08       | 98% ± 1.0%       | 6.71 ± 0.07       | 60% ± 1.7%       | 6.61 ± 0.10       |
| <b>8-OH-DPAT</b> | 93% ± 3.6%                             | 8.09 ± 0.11       | 63% ± 2.3%       | 7.50 ± 0.05       | 101% ± 1.5%      | 7.84 ± 0.18       | NT               | NT                |
| <b>Buspirone</b> | 44% ± 5.5%                             | 7.82 ± 0.13       | 49% ± 5.7%       | 7.14 ± 0.12       | 100% ± 1.1%      | 6.73 ± 0.08       | NT               | NT                |
| <b>Serotonin</b> | 100% ± 0.0                             | 7.48 ± 0.08       | 100% ± 0.0%      | 7.51 ± 0.05       | 100% ± 0.0%      | 6.89 ± 0.04       | 100% ± 0.0%      | 7.30 ± 0.08       |

**$E_{\max}$  and  $EC_{50}$  values (transformed from  $pEC_{50}$  values) used to calculate Bias Factors for compounds 10–17, 19, 20, 22, 27 and references**

**Table S2.**  $E_{\max}$  and  $EC_{50}$  values (transformed from  $pEC_{50}$  values) used to calculate Bias Factors for compounds 10–17, 19, 20, 22, 27 and references .

| Compd            | 5-HT <sub>1A</sub> functional activity |           |            |           |                   |           |                  |            |
|------------------|----------------------------------------|-----------|------------|-----------|-------------------|-----------|------------------|------------|
|                  | ERK                                    |           | cAMP       |           | $\beta$ -arrestin |           | Ca <sup>2+</sup> |            |
|                  | $E_{\max}$                             | $EC_{50}$ | $E_{\max}$ | $EC_{50}$ | $E_{\max}$        | $EC_{50}$ | $E_{\max}$       | $pEC_{50}$ |
| <b>10</b>        | 0,77                                   | 1.31E-08  | 0.91       | 7.96E-08  | 0.99              | 4.46E-07  | 0.74             | 8.58E-08   |
| <b>11</b>        | 0.95                                   | 1.25E-08  | 0.74       | 4.71E-08  | 1.01              | 1.15E-07  | 0.87             | 1.43E-08   |
| <b>12</b>        | 0.81                                   | 2.55E-08  | 0.79       | 1.86E-07  | 1.04              | 1.99E-06  | 0.65             | 1.04E-07   |
| <b>13</b>        | 0.83                                   | 1.75E-08  | 0.86       | 5.44E-08  | 0.99              | 2.60E-07  | 0.52             | 7.47E-08   |
| <b>14</b>        | 0.85                                   | 1.69E-07  | 0.71       | 2.44E-06  | 0.70              | 3.61E-06  | NT               | NT         |
| <b>15</b>        | 0.84                                   | 1.29E-08  | 0.76       | 6.62E-08  | 1.02              | 2.88E-07  | 0.73             | 1.11E-07   |
| <b>16</b>        | 0.92                                   | 7.93E-10  | 0.90       | 8.09E-09  | 0.96              | 1.05E-08  | 0.52             | 4.11E-08   |
| <b>17</b>        | 0.81                                   | 4.29E-10  | 0.89       | 8.85E-09  | 0.98              | 2.09E-08  | 0.57             | 1.72E-08   |
| <b>19</b>        | 0.85                                   | 8.72E-10  | 0.71       | 9.10E-09  | 0.99              | 1.73E-07  | 0.58             | 3.85E-08   |
| <b>20</b>        | 0.99                                   | 2.39E-08  | 1.00       | 4.79E-08  | 1.01              | 1.36E-07  | 0.98             | 4.54E-08   |
| <b>22</b>        | 1.00                                   | 4.94E-09  | 0.90       | 2.10E-08  | 0.97              | 2.51E-08  | 0.89             | 2.86E-08   |
| <b>27</b>        | 0.72                                   | 5.22E-08  | 0.41       | 9.25E-07  | 0.75              | 2.74E-06  | NT               | NT         |
| <b>1</b>         | 1.00                                   | 4.71E-09  | 0.92       | 6.01E-08  | 0.98              | 1.93E-07  | 0.60             | 2.47E-07   |
| <b>8-OH-DPAT</b> | 0.93                                   | 8.17E-09  | 0.63       | 3.19E-08  | 1.01              | 1.44E-08  | NT               | NT         |
| <b>Buspirone</b> | 0.44                                   | 1.51E-08  | 0.49       | 7.20E-08  | 1.00              | 1.86E-07  | NT               | NT         |
| <b>Serotonin</b> | 1.00                                   | 3.28E-08  | 1.00       | 3.07E-08  | 1.00              | 1.30E-07  | 1.00             | 4.99E-08   |

## Radioligand binding assay results and methodology for 5-HT<sub>2A</sub>, M<sub>1</sub> and H<sub>1</sub> receptors

**Table S3.** Radioligand binding assay results for 5-HT<sub>2A</sub>, M<sub>1</sub> and H<sub>1</sub> receptors using [<sup>3</sup>H]-ketanserin, [<sup>3</sup>H]-scopolamine and [<sup>3</sup>H]-pyrilamine, respectively.

| Compound     | percentage of control specific binding at 1 $\mu$ M concentration |                  |                  |
|--------------|-------------------------------------------------------------------|------------------|------------------|
|              | 5-HT <sub>2A</sub> R                                              | M <sub>1</sub> R | H <sub>1</sub> R |
| 10           | 23%                                                               | 10%              | 0%               |
| 11           | 0%                                                                | 6%               | 0%               |
| 12           | 3%                                                                | 10%              | 0%               |
| 13           | 12%                                                               | 0%               | 0%               |
| 14           | 3%                                                                | 4%               | 0%               |
| 15           | 0%                                                                | 0%               | 0%               |
| 16           | 2%                                                                | 0%               | 0%               |
| 17           | 4%                                                                | -1%              | 0%               |
| 18           | 0%                                                                | 0%               | 0%               |
| 19           | 4%                                                                | 0%               | 17%              |
| 20           | 44%                                                               | 0%               | 40%              |
| 21           | 0%                                                                | 0%               | 45%              |
| 22           | 4%                                                                | 8%               | 1%               |
| 23           | 0%                                                                | 6%               | 0%               |
| 24           | 0%                                                                | 1%               | 0%               |
| 25           | 0%                                                                | 2%               | 0%               |
| 26           | 0%                                                                | 0%               | 0%               |
| 27           | 0%                                                                | 0%               | 1%               |
| 1            | 0%                                                                | 0%               | 0%               |
| Buspirone    | 17%                                                               | 0%               | 50%              |
| Methiothepin | 100%                                                              | 23%              | 99%              |
| Mepyramine   | –                                                                 | –                | 99%              |
| Scopolamine  | –                                                                 | 100%             | –                |

### **Preparation of solutions of test and reference compounds**

10 mM stock solutions of tested compounds were prepared in DMSO. Serial dilutions of compounds were prepared in 96-well microplate in assay buffers using automated pipetting system epMotion 5070 (Eppendorf). Each compound was tested in a screening assay at final concentration of 1  $\mu$ M.

### **5-HT<sub>2A</sub> Receptor Binding Assay**

Radioligand binding was performed using membranes from CHO-K1 cells stably transfected with the human 5-HT<sub>2A</sub> receptor (PerkinElmer). All assays were carried out in duplicates. 50  $\mu$ L working solution of the tested compounds, 50  $\mu$ L [<sup>3</sup>H]-ketanserin (final concentration 1 nM) and 150  $\mu$ L diluted membranes (7  $\mu$ g protein per well) prepared in assay buffer (50 mM Tris, pH 7.4, 4 mM CaCl<sub>2</sub>, 0.1% ascorbic acid) were transferred to polypropylene 96-well microplate using 96-wells pipetting station Rainin Liquidator (MettlerToledo). Mianserin (10  $\mu$ M) was used to define nonspecific binding. Microplate was covered with a sealing tape, mixed and incubated for 60 minutes at 27 °C. The reaction was terminated by rapid filtration through GF/B filter mate presoaked with 0.5% polyethyleneimine for 30 minutes. Ten rapid washes with 200  $\mu$ L 50 mM Tris buffer (4 °C, pH 7.4) were performed using automated harvester system Harvester-96 MACH III FM (Tomtec). The filter mates were dried at 37 °C in forced air fan incubator and then solid scintillator MeltiLex was melted on filter mates at 90 °C for 5 minutes. Radioactivity was counted in MicroBeta2 scintillation counter (PerkinElmer). Data were fitted to a one-site curve-fitting equation with Prism 6 (GraphPad Software).

### **M<sub>1</sub> Receptor Binding Assay**

Radioligand binding was performed using membranes from CHO-K1 cells stably transfected with the human M<sub>1</sub> receptor. All assays were carried out in duplicates. 50 µL working solution of the tested compounds, 50 µL [<sup>3</sup>H]-scopolamine (spec. act. 84.1 Ci/mmol, final concentration 0.2 nM) and 150 µL diluted membranes (35 µg protein per well) prepared in assay buffer (PBS, pH 7.4) were transferred to polypropylene 96-well microplate using 96-wells pipetting station Rainin Liquidator (MettlerToledo). Atropine (10 µM) was used to define nonspecific binding. Microplate was covered with a sealing tape, mixed and incubated for 120 minutes at 27 °C. The reaction was terminated by rapid filtration through GF/A filter mate presoaked with 0.5% polyethyleneimine for 30 minutes. Five rapid washes with 300 µL 50 mM Tris buffer (4 °C, pH 7.4) were performed using 96-well FilterMate harvester (PerkinElmer, USA). The filter mates were dried at 37 °C in forced air fan incubator and then solid scintillator MeltiLex was melted on filter mates at 90 °C for 4 minutes. Radioactivity was counted in MicroBeta2 scintillation counter (PerkinElmer). Data were fitted to a one-site curve-fitting equation with Prism 5 (GraphPad Software).

### **H<sub>1</sub> Receptor Binding Assay**

Radioligand binding was performed using membranes from CHO-K1 cells stably transfected with the human histaminergic H<sub>1</sub> receptor. All assays were carried out in duplicates. 50 µL working solution of the tested compounds, 50 µL [<sup>3</sup>H]-Pyrilamine (spec. act. 20.0 Ci/mmol, final concentration 1.5 nM) and 150 µL diluted membranes (5 µg protein per well) prepared in assay buffer (50 mM Tris-HCl, pH 7.4; 5 mM MgCl<sub>2</sub>) were transferred to polypropylene 96-well microplate using 96-wells pipetting station Rainin Liquidator (MettlerToledo). Mepyramine (10 µM) was used to define nonspecific binding. Microplate was covered with a sealing tape, mixed and incubated for 60 minutes at 27 °C. The reaction was terminated by rapid filtration through

GF/B filter mate presoaked with 0.5% polyethyleneimine for 30 minutes. Five rapid washes with 300  $\mu$ L 50 mM Tris buffer (4 °C, pH 7.4) were performed using 96-well FilterMate harvester (PerkinElmer, USA). The filter mates were dried at 37 °C in forced air fan incubator and then solid scintillator MeltiLex was melted on filter mates at 90 °C for 4 minutes. Radioactivity was counted in MicroBeta2 scintillation counter (PerkinElmer). Data were fitted to a one-site curve-fitting equation with Prism 5 (GraphPad Software).



# **Effect of compound 17 in the forced swimming test in rats (15 and 60 minutes after oral administration).**

**Table S4.** Effect of compound 17 in the forced swimming test in rats (15 and 60 minutes after oral administration).

| Treatment                    | Dose (mg/kg)                                         | 15 minutes after p.o.<br>administration                                          | 60 minutes after p.o.<br>administration                         |
|------------------------------|------------------------------------------------------|----------------------------------------------------------------------------------|-----------------------------------------------------------------|
|                              |                                                      | Immobility time (s) (mean $\pm$ SEM)                                             |                                                                 |
| Vehicle (water)              | 0                                                    | 252.50 $\pm$ 12.19                                                               | 212.63 $\pm$ 17.1                                               |
| Compd 17                     | 0.04                                                 | 212.33 $\pm$ 23.53; ns                                                           | 174.75 $\pm$ 10.2; ns                                           |
|                              | 0.16                                                 | 189.67 $\pm$ 10.47; p<0.05                                                       | 145.43 $\pm$ 13.9; p<0.01                                       |
|                              | 0.63                                                 | 76.17 $\pm$ 17.11; p<0.00001                                                     | 67.75 $\pm$ 12.5; p<0.00001                                     |
|                              | 2.5                                                  | 2.38 $\pm$ 0.46; p<0.00001                                                       | 6.86 $\pm$ 2.3; p<0.00001                                       |
|                              |                                                      | F <sup>a</sup> (4,29)=63.220; p<0.0000001                                        | F <sup>a</sup> (4,33)=43.736; p<0.000001                        |
| Vehicle (water)<br>+ vehicle | 0 + 0                                                | 253.20 $\pm$ 11.70                                                               | 207.14 $\pm$ 16.2                                               |
| Compd 17 +<br>vehicle        | 2.5 + 0 (15 minutes)/<br>0.16 + 0 (60 minutes)       | 2.38 $\pm$ 0.46;<br>p<0.001 vs veh<br>p<0.001 vs WAY<br>p<0.001 vs WAY+ Compd 17 | 114.00 $\pm$ 9.4<br>p<0.001 vs veh<br>p<0.001 vs WAY + Compd 17 |
| WAY-100635 +<br>vehicle      | 0.63 + 0                                             | 260.43 $\pm$ 8.65;<br>ns vs veh<br>p<0.001 vs NLX204<br>p<0.001 vs WAY+NLX204    | 260.43 $\pm$ 8.7<br>p<0.05 vs veh<br>p<0.001 vs WAY + Compd 17  |
| WAY-100635 +<br>Compd 17     | 0.63 + 2.5 (15 minutes)/<br>0.63 + 0.16 (60 minutes) | 142.38 $\pm$ 17.57;<br>p<0.001 vs veh<br>p<0.001 vs WAY<br>p<0.001 vs Compd 17   | 210.00 $\pm$ 12.7<br>p<0.01 vs WAY<br>p<0.001 vs Compd 17       |
|                              |                                                      | F <sup>b</sup> (1,27)=31.616; p<0.0001                                           | F <sup>b</sup> (1,24)=3.1208; NS                                |

Compound 17 was given p.o. 15 min or 60 min, while WAY-100635 was injected s.c. 30 min or 75 min, respectively before the test. Values represent the mean  $\pm$  SEM of the immobility time during 5-min test session compared to: the respective vehicle group (<sup>a</sup>one-way ANOVA followed by Bonferroni's post hoc test – when only one drug was given); or the respective groups (<sup>b</sup> two-way ANOVA followed by Newman-Keuls post hoc test, when two drugs were injected); N=6-8

Dose-response curves for functional activity.

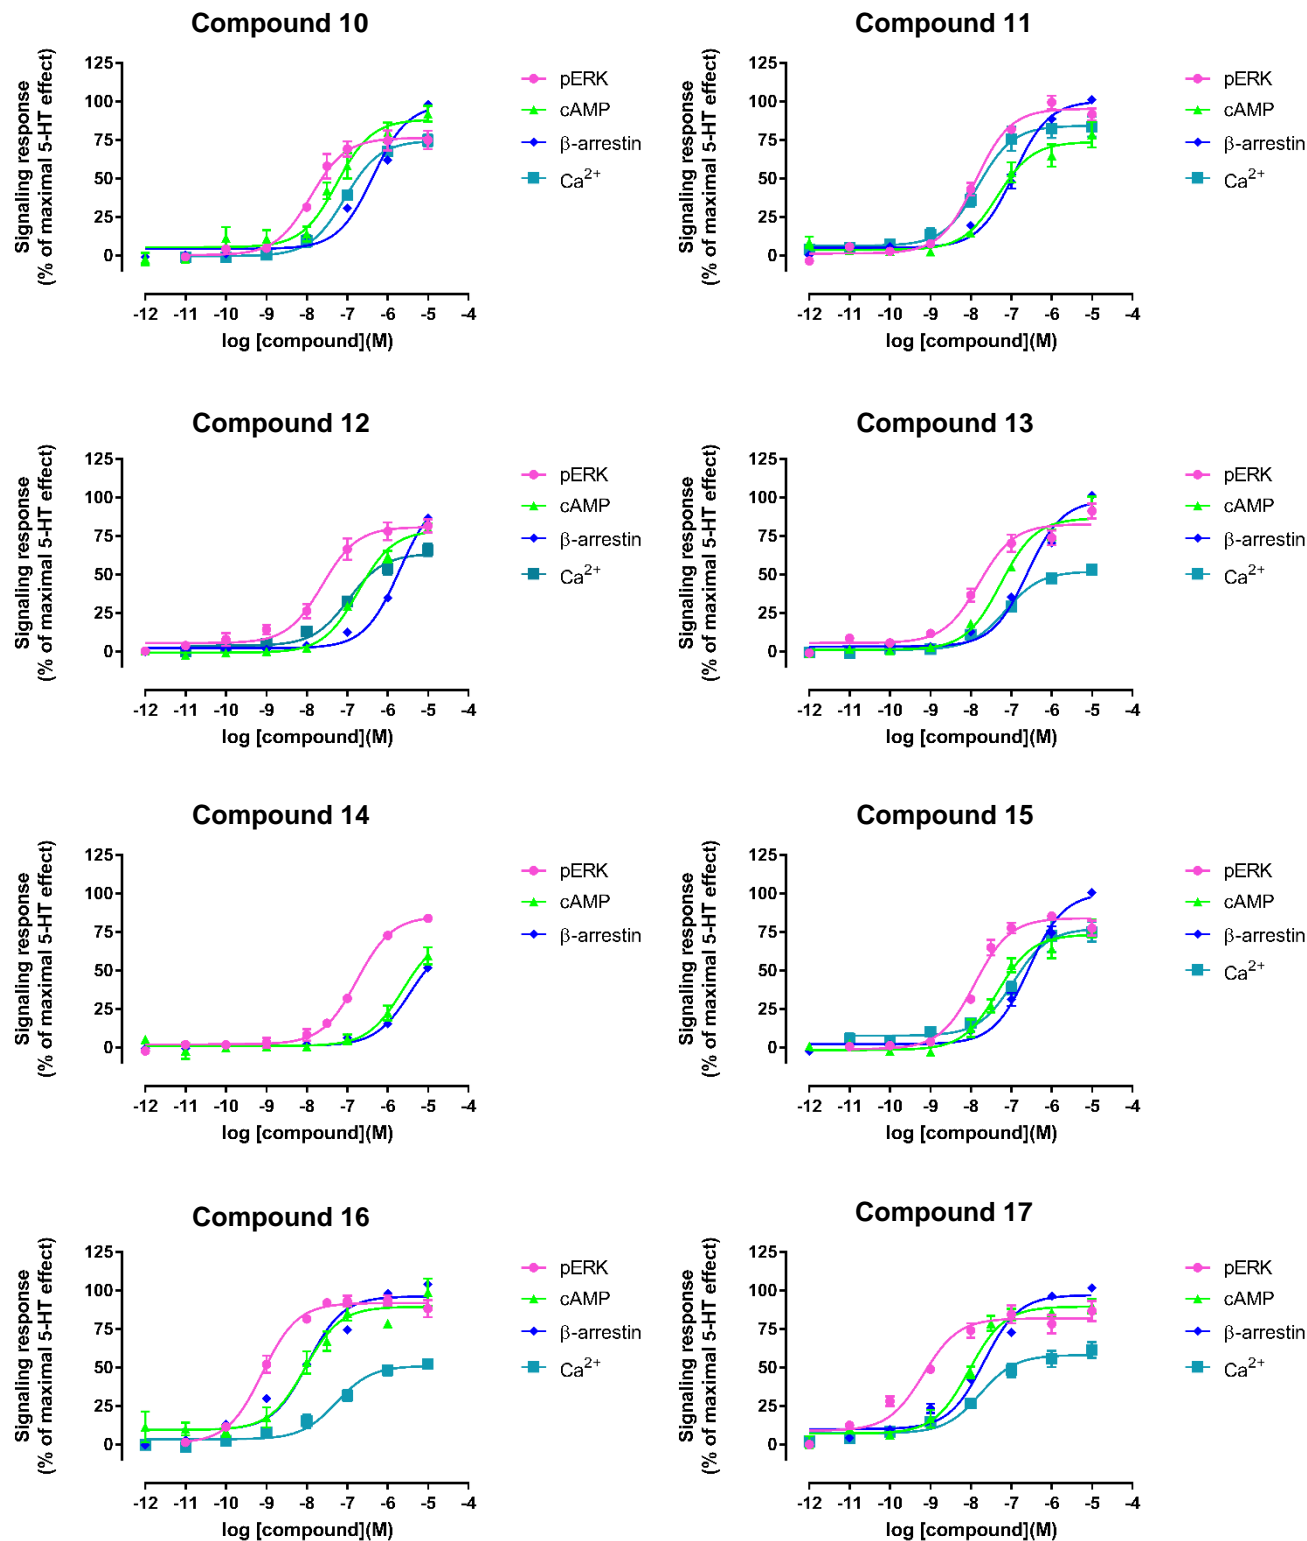

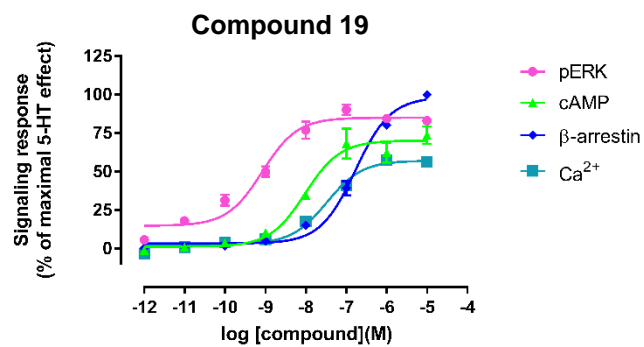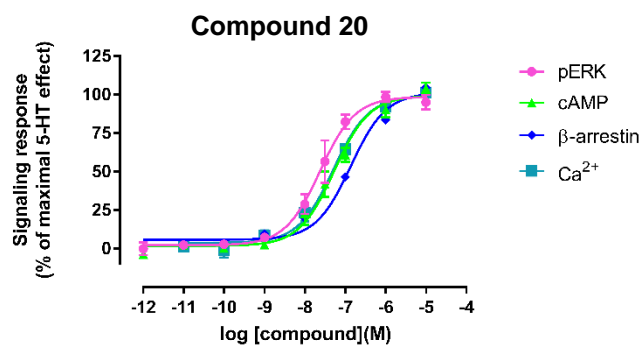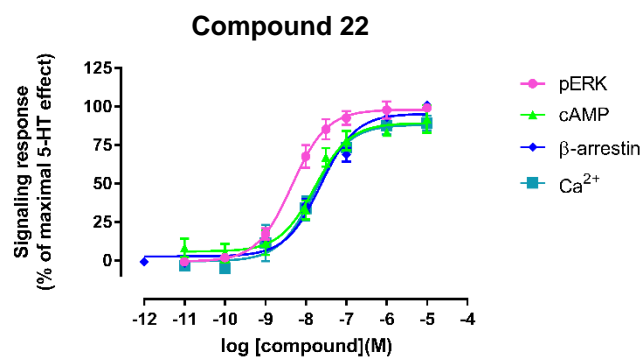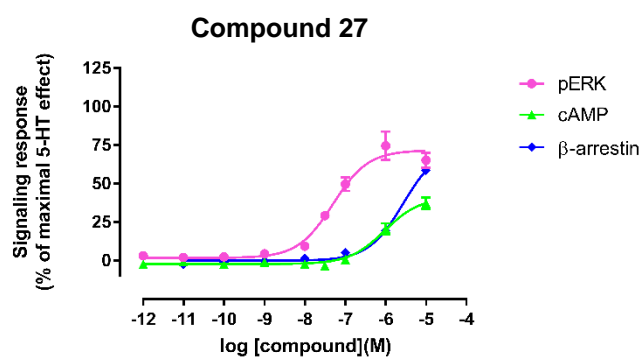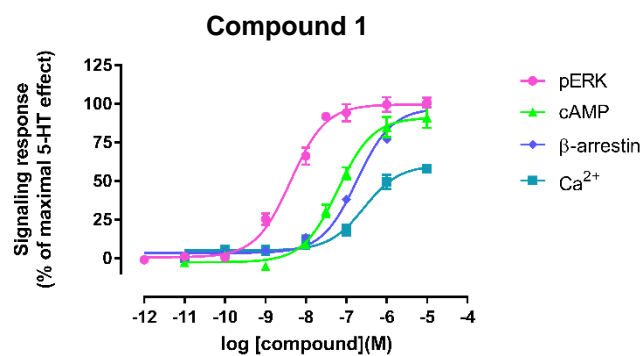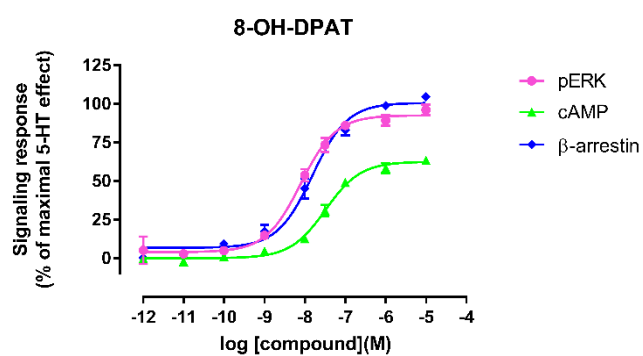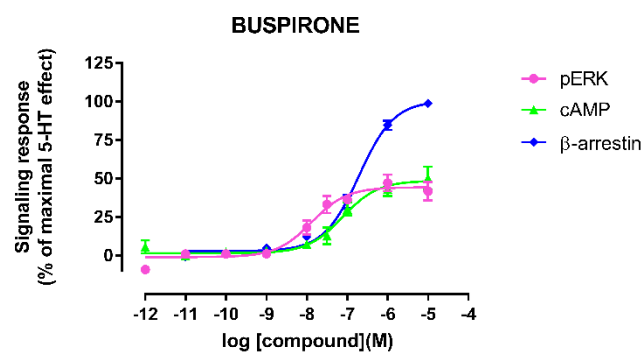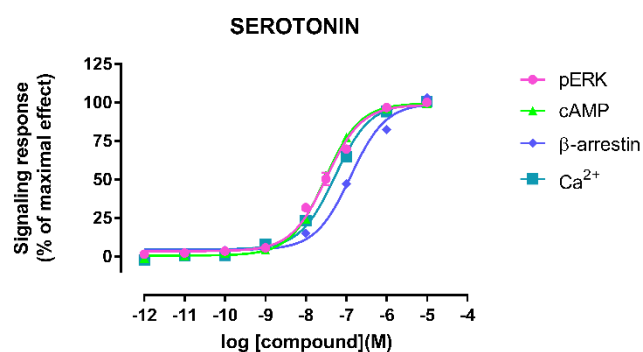

Supplement: Supplementary file 1 [file 14507582]
